# Supplementary material for: Swapping the chitin-binding domain in Bacillus chitinases improves the substrate binding affinity and conformational stability
Source: Royal Society of Chemistry journal article supplement (doi:10.1039/b923048c), 2010-05-26
Supplement: b923048c.pdf [file b923048c.pdf]

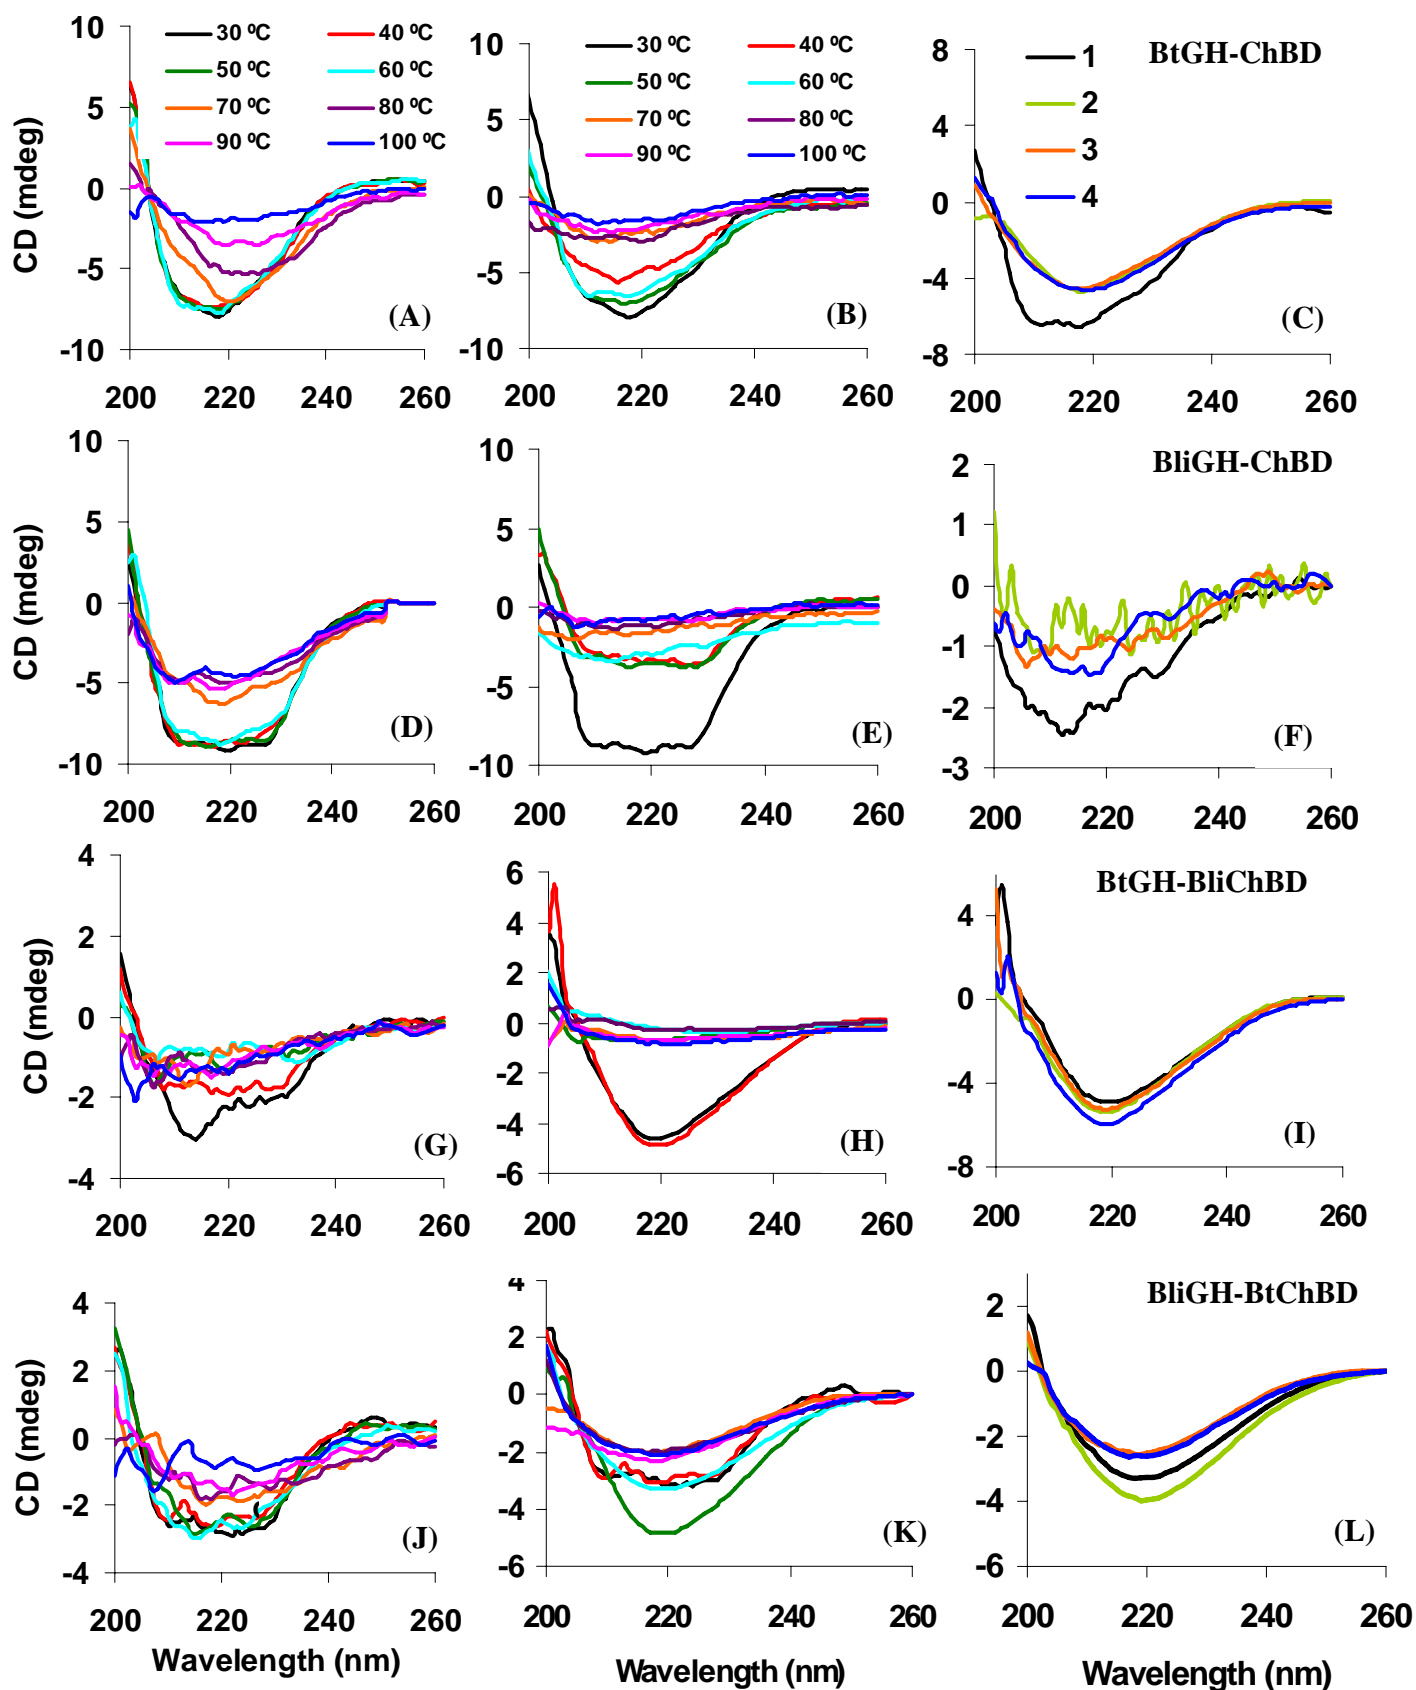

Fig. S1: Temperature dependent CD spectra of recombinant chitinases

### BtGH-ChBD

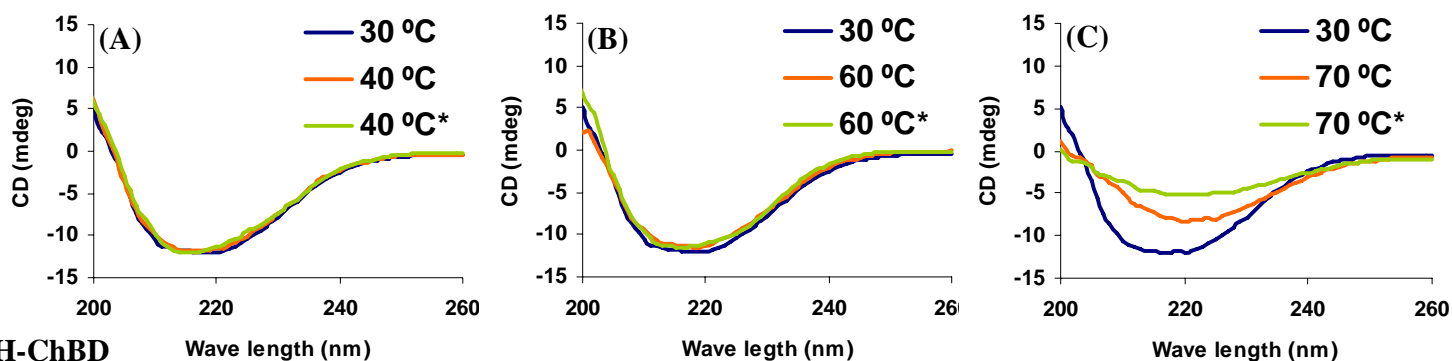

### BliGH-ChBD

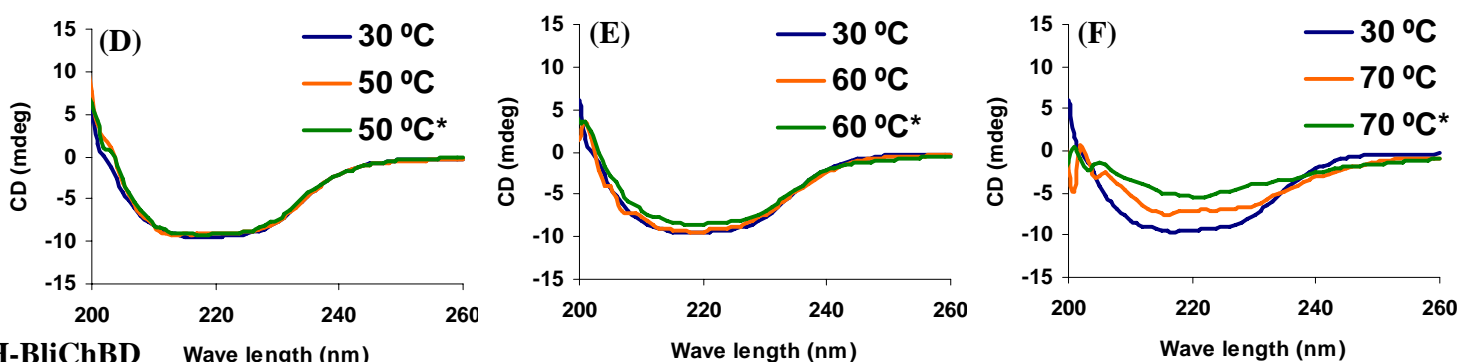

### BtGH-BliChBD

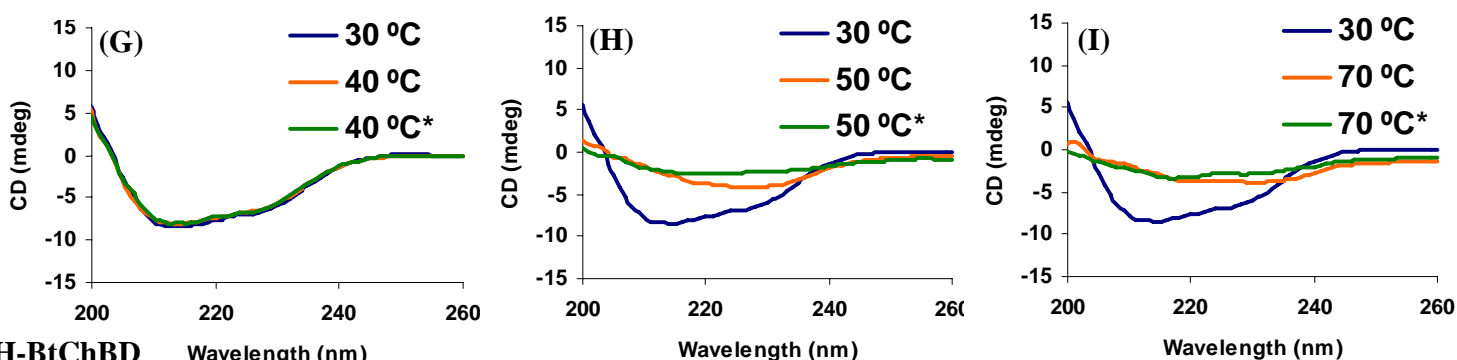

### BliGH-BtChBD

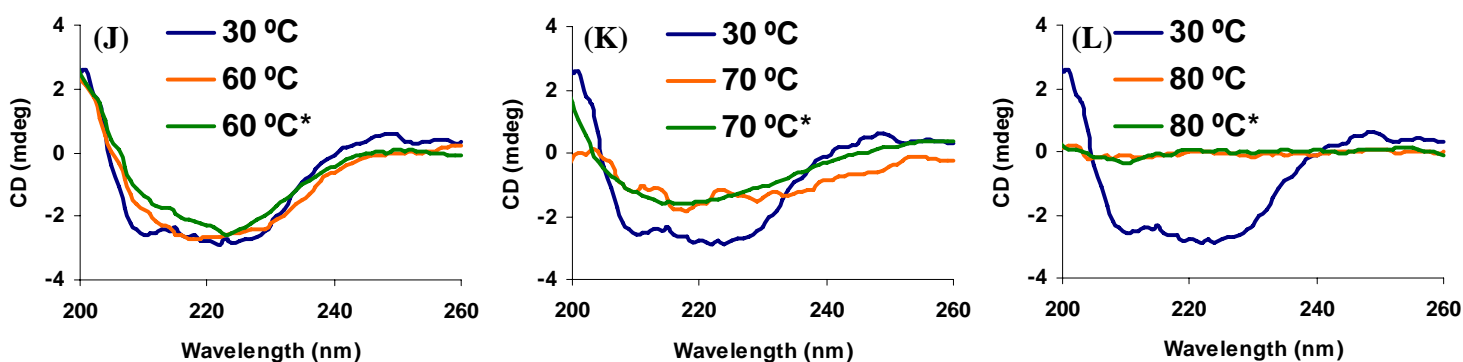

Fig. S2: Thermal unfolding of recombinant chitinases

### Legend for Fig. S1

Fifty  $\mu\text{g}$  of purified recombinant chitinase in 10 mM sodium acetate buffer pH 5.2 was analysed for CD spectrum at each temperature,

CD spectrum was obtained at 30 °C followed by gradual increase in temperature up to 100 °C to determine the relative change in the spectra of BtGH-ChBD (**A**), BliGH-ChBD (**D**), BtGH-BliChBD (**G**), and BliGH-BtChBD (**J**) with increase in temperature. Recombinant chitinases were pre-incubated at different temperatures for 1 h and analysed for CD spectrum to determine the thermal stability of BtGH-ChBD (**B**), BliGH-ChBD (**E**), BtGH-BliChBD (**H**), and BliGH-BtChBD (**K**). Chitinases were pre-incubated at optimum temperature for 1-4 h and analysed for CD spectrum at 30 °C to determine the conformational stability of BtGH-ChBD (**C**), BliGH-ChBD (**F**), BtGH-BliChBD (**I**), and BliGH-BtChBD (**L**).

### Legend for Fig. S2

Fifty  $\mu\text{g}$  of purified recombinant chitinase in 10 mM sodium acetate buffer pH 5.2 was analysed for CD spectrum at 30 °C followed by heating to certain temperature and cooling the same to 30 °C (denoted by \*).
